# Supplementary material for: Composite beads from chitosan and zeolitic imidazolate framework-8 for the adsorption and photocatalytic degradation of reactive red 141
Source: Royal Society of Chemistry journal article supplement (doi:10.1039/d3ra01187a), 2023-01-01
Supplement: d3ra01187a1.pdf [file d3ra01187a1.pdf]

### Supplementary material

#### Composite beads from chitosan and zeolitic imidazolate framework-8 for the adsorption and photocatalytic degradation of reactive red 141

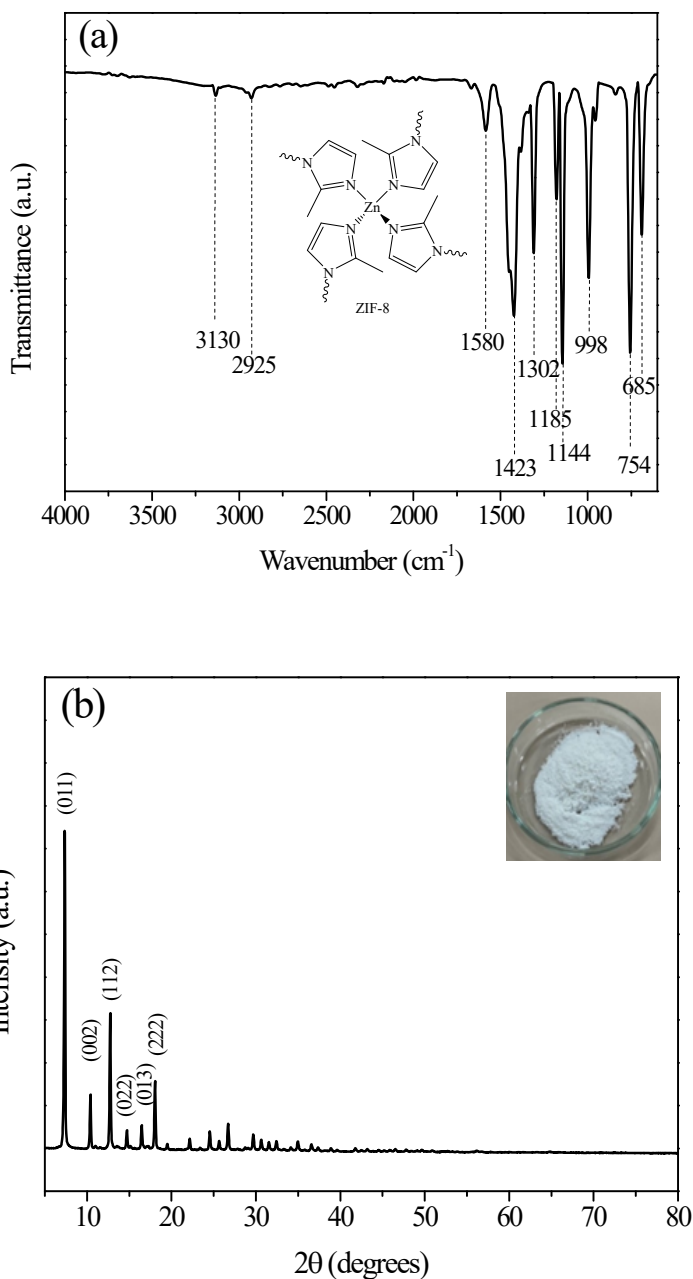

**Figure S1.** The (a) FTIR spectrum and (b) XRD pattern of ZIF-8

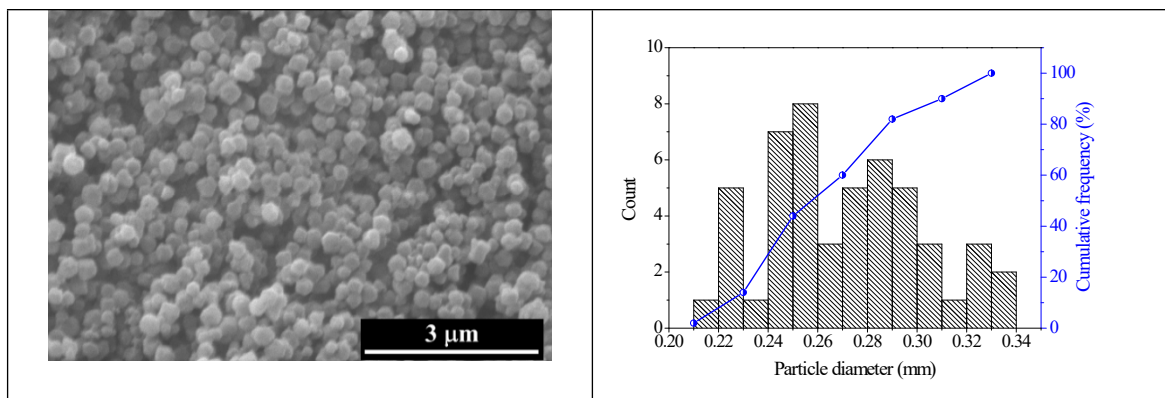

**Figure S2.** SEM image (Magnification 15000x) (left) and particle size distribution (right) of ZIF-8

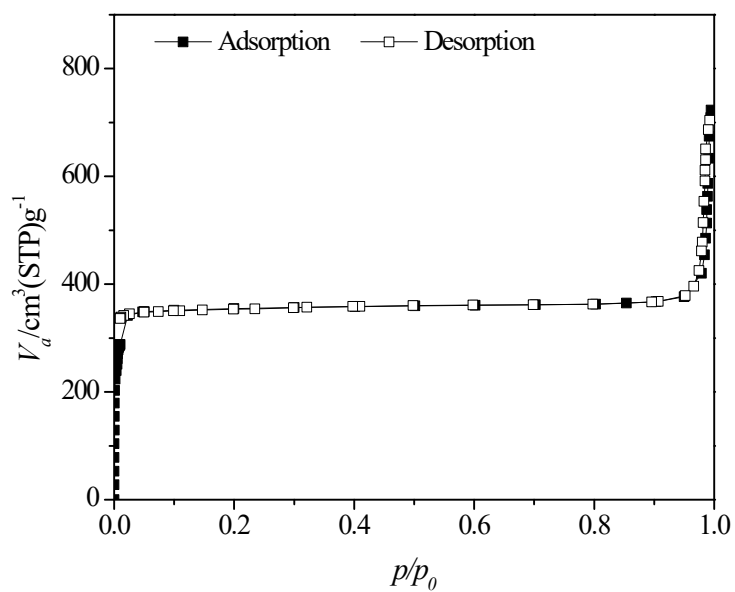

**Figure S3.** Nitrogen adsorption isotherm of ZIF-8

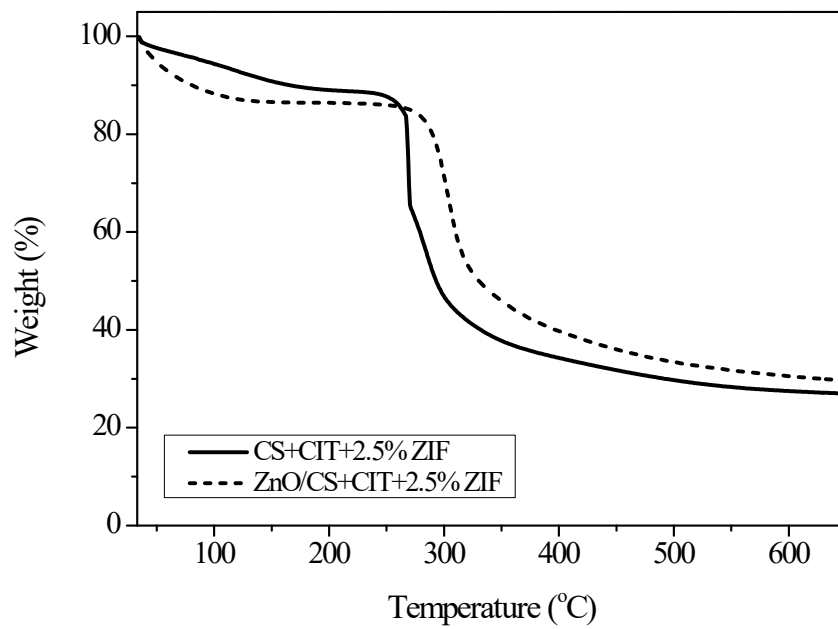

**Figure S4.** TGA thermograms of CS+CIT+2.5% ZIF beads and ZnO/CS+CIT+2.5% ZIF beads
